# Supplementary material
Source: publisher site journal article supplement (https://static.cambridge.org/content/id/urn:cambridge.org:id:article:S1047951120002929/resource/name/S1047951120002929supp001.docx)
Supplement: Supplementary file 1 [file S1047951120002929supp001.docx]

**Table S1: List of Stage 1 procedures (N=35)**

| **Procedure** | **Number** |
| --- | --- |
| Stage 1 Norwood | 6 |
| PDA stenting | 10 |
| PDA stenting with BPV | 3 |
| BT shunt | 7 |
| PA banding | 6 |
| PA band with coarctation repair | 3 |

PDA stenting: Patent duct arteriosus stenting; BPV- Balloon pulmonary valvotomy; BT shunt – Blalock-Taussig shunt; PA band – Pulmonary artery banding.

**Table S2: List of cardiac diagnosis of patients in the intention-to-treat group undergoing cardiac procedures.**

| **Diagnosis** | **Stage 1**  **(35)** | **Stage 2**  **(51)** | **Stage 3**  **(17)** |
| --- | --- | --- | --- |
| **Hypoplastic left heart** | 5 | 1 | 1 |
| **Tricuspid atresia** | 7 | 13 | 6 |
| **Heterotaxy syndromes** | 9 | 9 | 1 |
| **Pulmonary atresia-intact ventricular septum*** | 5 | 9* | 1 |
| **Others**** | 3 | 8 | 2 |
| **Complex Double outlet right ventricle** | 3 | 4 | 1 |
| **Double inlet left ventricle** | 3 | 7 | 5 |

*Five underwent Bidirectional Glenn shunt (BDGS) while 4 patients had 1 ½ ventricle repairs.

* *Others – Left atrio-ventricular valve atresia with single ventricle; Large ventricular septal defect amounting to Single Ventricle, Hypoplastic Right ventricle with VSD.
